# Supplementary material for: Deficient vergence prism adaptation in subjects with decompensated heterophoria
Source: PLoS One. 2019 Jan 18;14(1):e0211039. doi: 10.1371/journal.pone.0211039 (PMC6338415; doi:10.1371/journal.pone.0211039)
Supplement: S1 Dataset — (XLS) [file pone.0211039.s001.xls]

## Sheet: PA
	1 min	2 min	3 min	4 min	5 min	6 min	7 min	8 min	9 min	10 min
NPh1	-4.24	-3.11	-1.98	-3.39	-2.83	-3.68	-4.81	-3.68	-3.11	-4.52
NPh2	-2.26	-2.26	-1.98	-1.98	-1.98	-1.7	-1.98	-1.7	-1.98	-1.7
NPh3	-2.54	-1.7	-1.7	-2.26	-1.7	-0.57	-0.85	-1.13	-1.41	-1.98
NPh4	-1.49	-0.65	-0.65	-0.36	-0.65	-0.93	-0.65	-0.36	-0.08	-0.08
NPh5	-3.68	-3.68	-2.83	-2.54	-2.54	-2.54	-1.98	-2.83	-1.98	-2.54
NPh6	-2.26	-1.98	-0.85	-1.41	-1.13	-1.13	-1.41	-0.57	-0.57	-0.57
NPh7	-3.68	-2.83	-2.54	-1.13	-2.26	-2.83	-1.7	-2.83	-1.7	-3.68
NPh8	-1.98	-0.28	-0.85	-1.41	-1.98	-0.85	-2.26	-2.54	-1.98	-1.98
NPh9	-2.54	-1.7	-2.54	-1.41	-1.7	-1.98	-1.41	-1.41	-1.7	-1.41
NPh10	-4.24	-4.24	-2.83	-2.54	-3.11	-2.54	-2.54	-2.54	-2.54	-2.26
NPh11	-4.92	-5.2	-3.51	-2.66	-2.94	-3.79	-2.94	-3.51	-4.35	-4.07
NPh12	-4.52	-3.96	-2.26	-2.54	-3.11	-2.54	-2.83	-3.39	-3.39	-2.26
NPh13	-5.94	-2.83	-3.11	-3.96	-3.11	-3.96	-3.11	-3.11	-2.83	-2.83
NPh14	-3.68	-2.83	-2.54	-1.13	-2.26	-2.83	-1.7	-2.83	-1.7	-3.68
NPh15	-3.11	-2.83	-3.68	-3.39	-3.11	-2.54	-1.98	-1.98	-4.81	-3.11
CPh1	-5.4	-4.8	-4.2	-3.43	-3.21	-4.52	-3.12	-3.1	-2.8	-3.45
CPh2	-3.68	-5.09	-6.22	-5.09	-5.37	-4.52	-7.35	-5.37	-5.09	-6.22
CPh3	-3.11	-1.41	-1.41	-1.41	-1.41	-1.41	-4.81	-2.83	-1.41	-3.11
CPh4	-3.68	-3.11	-3.11	-3.39	-2.54	-3.68	-2.26	-3.39	-2.83	-2.26
CPh5	-4.81	-3.11	-1.41	-1.98	-0.85	-3.96	-0.57	0	0.28	-0.28
CPh6	-5.09	-3.96	-4.52	-5.09	-3.96	-3.96	-5.65	-5.09	-3.68	-2.83
CPh7	-4.81	-3.96	-3.68	-3.68	-2.54	-3.68	-3.68	-3.11	-2.26	-3.68
CPh8	-5.37	-4.24	-3.68	-2.54	-3.39	-4.52	-5.65	-4.81	-2.83	-5.09
CPh9	-5.65	-3.11	-4.64	-1.98	-3.68	-3.96	-2.54	-2.54	-2.77	-3.68
CPh10	-3.15	-2.8	-3.12	-3.5	-2.91	-2.84	-3.12	-3.11	-2.8	-3.45
CPh11	-5.09	-6.5	-6.5	-6.5	-5.94	-5.94	-6.5	-6.5	-6.79	-6.22
CPh12	-2.26	-2.26	-1.7	-1.13	-1.13	-1.13	-0.85	-1.41	-0.57	-1.13
CPh13	-8.48	-5.94	-3.96	-6.22	-5.65	-4.52	-6.22	-3.68	-4.81	-5.65
CPh14	-4.24	-3.96	-3.68	-2.83	-2.83	-2.54	-2.54	-3.11	-2.83	-2.54
CPh15	-6.79	-5.65	-3.68	-4.52	-5.94	-4.81	-5.37	-3.68	-4.24	-3.39
dCPh1	-5.65	-3.96	-3.39	-3.68	-4.24	-5.37	-3.96	-4	-3.7	-4.2
dCPh2	-3.39	-4.24	-3.39	-3.39	-3.68	-3.96	-3.68	-3.96	-3.96	-3.96
dCPh3	-5.9	-5.9	-5.4	-5.9	-5.1	-5.4	-5.9	-4.5	-5.6	-4.8
dCPh4	-4.81	-3.68	-2.83	-4.81	-4.52	-5.09	-4.24	-3.39	-3.68	-4.24
dCPh5	-5.37	-5.37	-5.37	-4.81	-4.24	-4.81	-4.24	-4.52	-3.11	-4.52
dCPh6	-6.5	-4.24	-5.94	-5.65	-5.09	-5.37	-6.22	-6.5	-6.5	-7.63
dCPh7	-5.65	-3.11	-4.64	-1.98	-3.68	-3.96	-2.54	-2.54	-2.77	-3.68
dCPh8	-6.2	-5.9	-5.4	-5.7	-5.7	-5.4	-4.2	-5.2	-4.8	-5.9
dCPh9	-5.7	-4.2	-3.4	-3.7	-3.7	-4	-4	-3.7	-4	-4.2
dCPh10	-4.8	-6.5	-5.7	-4.8	-4.2	-3.8	-4.2	-4.5	-5.7	-5.94
dCPh11	-12.42	-7.05	-6.2	-7.9	-16.1	-4.96	-5.92	-7.9	-6.48	-7.33
dCPh12	-5.9	-5.9	-5.4	-5.7	-5.9	-5.4	-6.2	-5.4	-5.7	-6.2
dCPh13	-5.4	-6.1	-5.4	-4.8	-4.8	-4.2	-4.8	-4.5	-4.8	-4.8
dCPh14	-5.8	-3.68	-2.8	-4.81	-4.9	-5.09	-4.24	-4.8	-4.2	-4.24
dCPh15	-5.94	-6.79	-6.5	-5.65	-5.65	-5.94	-6.22	-5.37	-5.65	-5.94

## Sheet: par a and c
	parameter a	parameter c
NPh1	-3.49	1.33
NPh2	-1.905	0.861
NPh3	-1.309	1.646
NPh4	-0.463	1.098
NPh5	-2.234	2.391
NPh6	-0.806	1.824
NPh7	-2.05	1.718
NPh8	-1.597	1.255
NPh9	-1.565	1.443
NPh10	-2.08	3.591
NPh11	-3.388	2.391
NPh12	-2.653	2.532
NPh13	-3.043	2.329
NPh14	-2.05	1.718
NPh15	-2.907	1.763
CPh1	-2.428	6.085
CPh2	-5.45	0.51
CPh3	-2.15	1.221
CPh4	-2.856	1.524
CPh5	-0.589	4.744
CPh6	-4.139	2.629
CPh7	-2.938	3.266
CPh8	-4.12	1.12
CPh9	-2.64	3.968
CPh10	-3.025	1.169
CPh11	-6.50333	6
CPh12	-0.938	1.929
CPh13	-4.71333	6
CPh14	-2.344	3.499
CPh15	-3	7.48
dCPh1	-4.037	2.04
dCPh2	-3.752	1.392
dCPh3	-5.32	1.46
dCPh4	-3.924	2.703
dCPh5	-3.633	4.775
dCPh6	-6.87667	6
dCPh7	-2.64	3.968
dCPh8	-5	4
dCPh9	-3.779	2.352
dCPh10	-4.822	2.721
dCPh11	-7.23667	6
dCPh12	-5.76667	6
dCPh13	-6.233	6.383
dCPh14	-4.357	1.754
dCPh15	-5.65333	6

## Sheet: aftereffect
	aftereffect
NPh1	0.6
NPh2	0
NPh3	7.1
NPh4	3.6
NPh5	2
NPh6	1.7
NPh7	4.2
NPh8	3.7
NPh9	4.8
NPh10	1.1
NPh11	-2.9
NPh12	0.3
NPh13	0.9
NPh14	4.2
NPh15	1.1
CPh1	1.1
CPh2	1.7
CPh3	-1.1
CPh4	1.7
CPh5	3.1
CPh6	-0.6
CPh7	-0.3
CPh8	1.1
CPh9	0.6
CPh10	1.4
CPh11	1.4
CPh12	2.8
CPh13	2.8
CPh14	3.7
CPh15	0.9
dCPh1	0.2
dCPh2	1.4
dCPh3	-0.2
dCPh4	-0.9
dCPh5	0.6
dCPh6	-1.1
dCPh7	0.6
dCPh8	0.5
dCPh9	1.2
dCPh10	0.5
dCPh11	-0.8
dCPh12	1.1
dCPh13	0.8
dCPh14	1
dCPh15	-2
